# Supplementary material for: Muscle denervation promotes functional interactions between glial and mesenchymal cells through NGFR and NGF
Source: PubMed Central journal article supplement — iScience. 2023 Jun 13;26(7):107114. doi: 10.1016/j.isci.2023.107114 (PMC10319848; doi:10.1016/j.isci.2023.107114), 2023-06-13
Supplement: mmc1.pdf [file mmc1.pdf]

iScience, Volume 26

## **Supplemental information**

### **Muscle denervation promotes functional interactions between glial and mesenchymal cells through NGFR and NGF**

**Chiara Nicoletti, Xiuqing Wei, Usue Etxaniz, Chiara D'Ercole, Luca Madaro, Ranjan Perera, and Pier Lorenzo Puri**

# Supplementary Figure 1

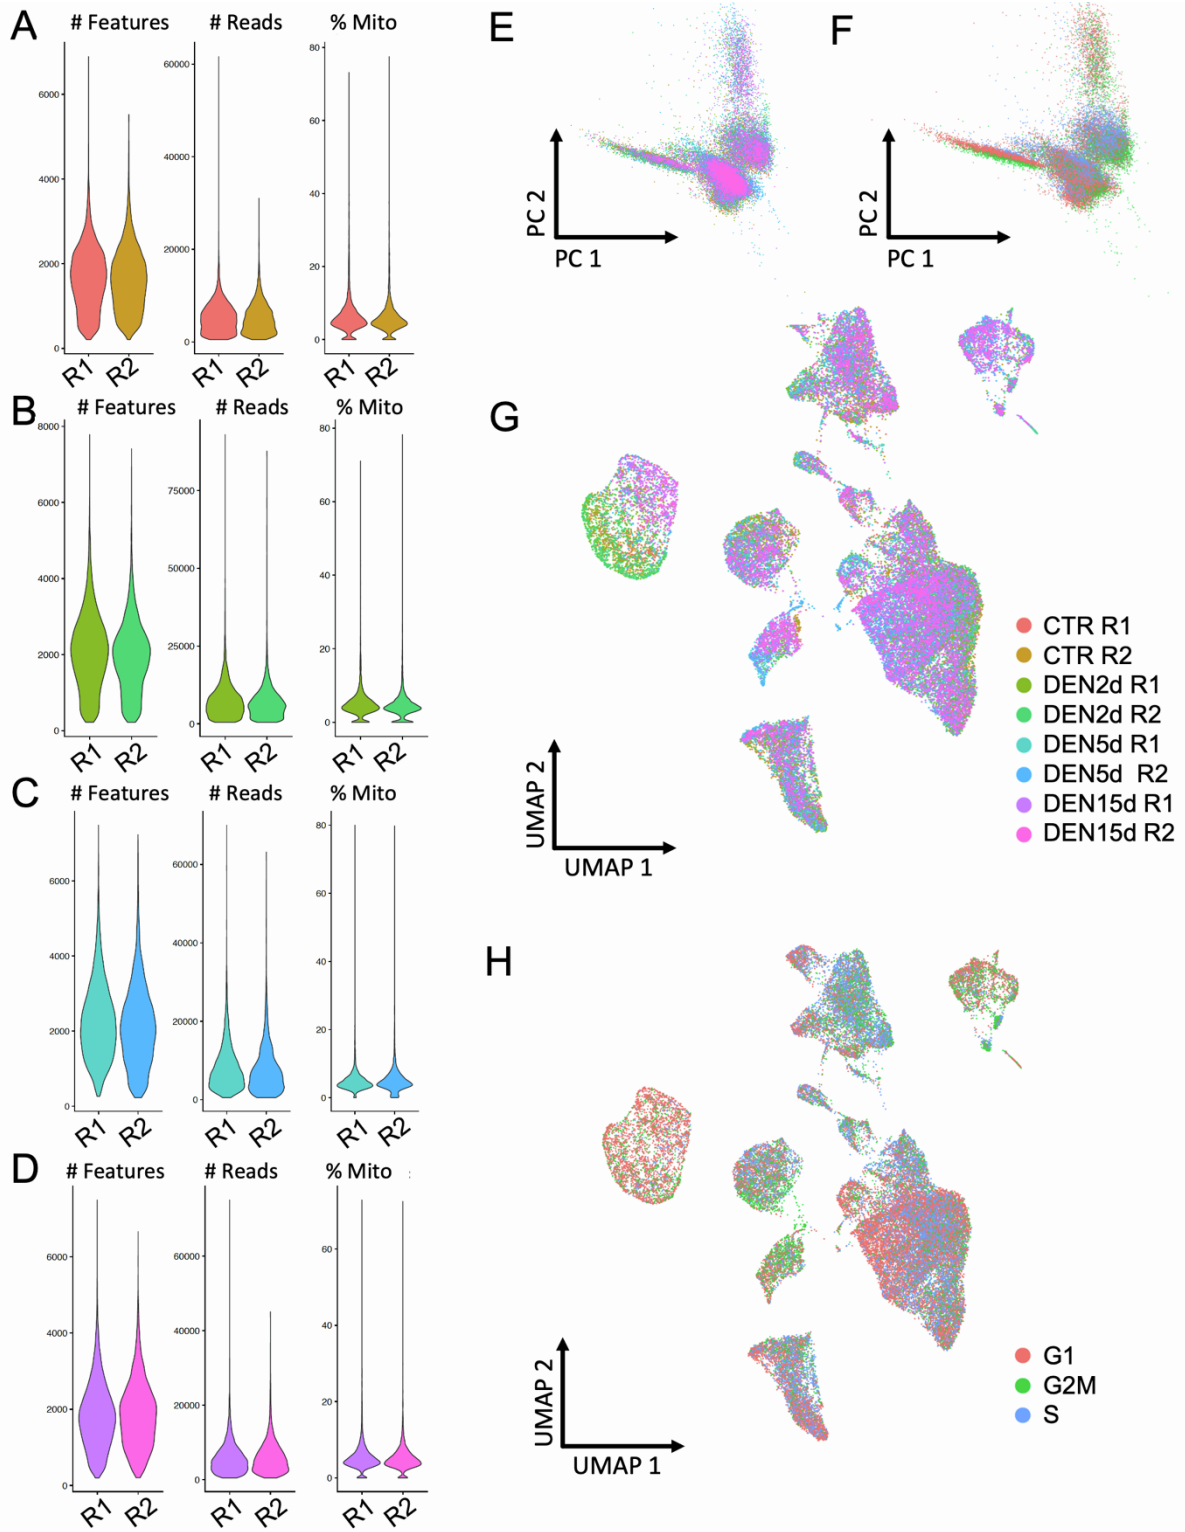

**Figure S1. scRNA-seq quality controls and dimensionality reduction, Related to Figure 1**

(A-D) Number of genes (# Features), sequencing reads (# Reads) and percentage of mitochondrial transcripts (% Mito) for each cell and each biological sample (R1 and R2) in (A) CTR, (B) 2-days, (C) 5-days and (D) 15-days post-denervation.

(E-F) PCA embedding of all the single cells comprising the dataset colored by either (G) biological replicate or (H) cell cycle phase.

(G) UMAP embedding of all the single cells comprising the dataset colored by biological replicate.

(H) UMAP embedding of all the single cells comprising the dataset colored by cell cycle phase.

Supplementary Figure 2

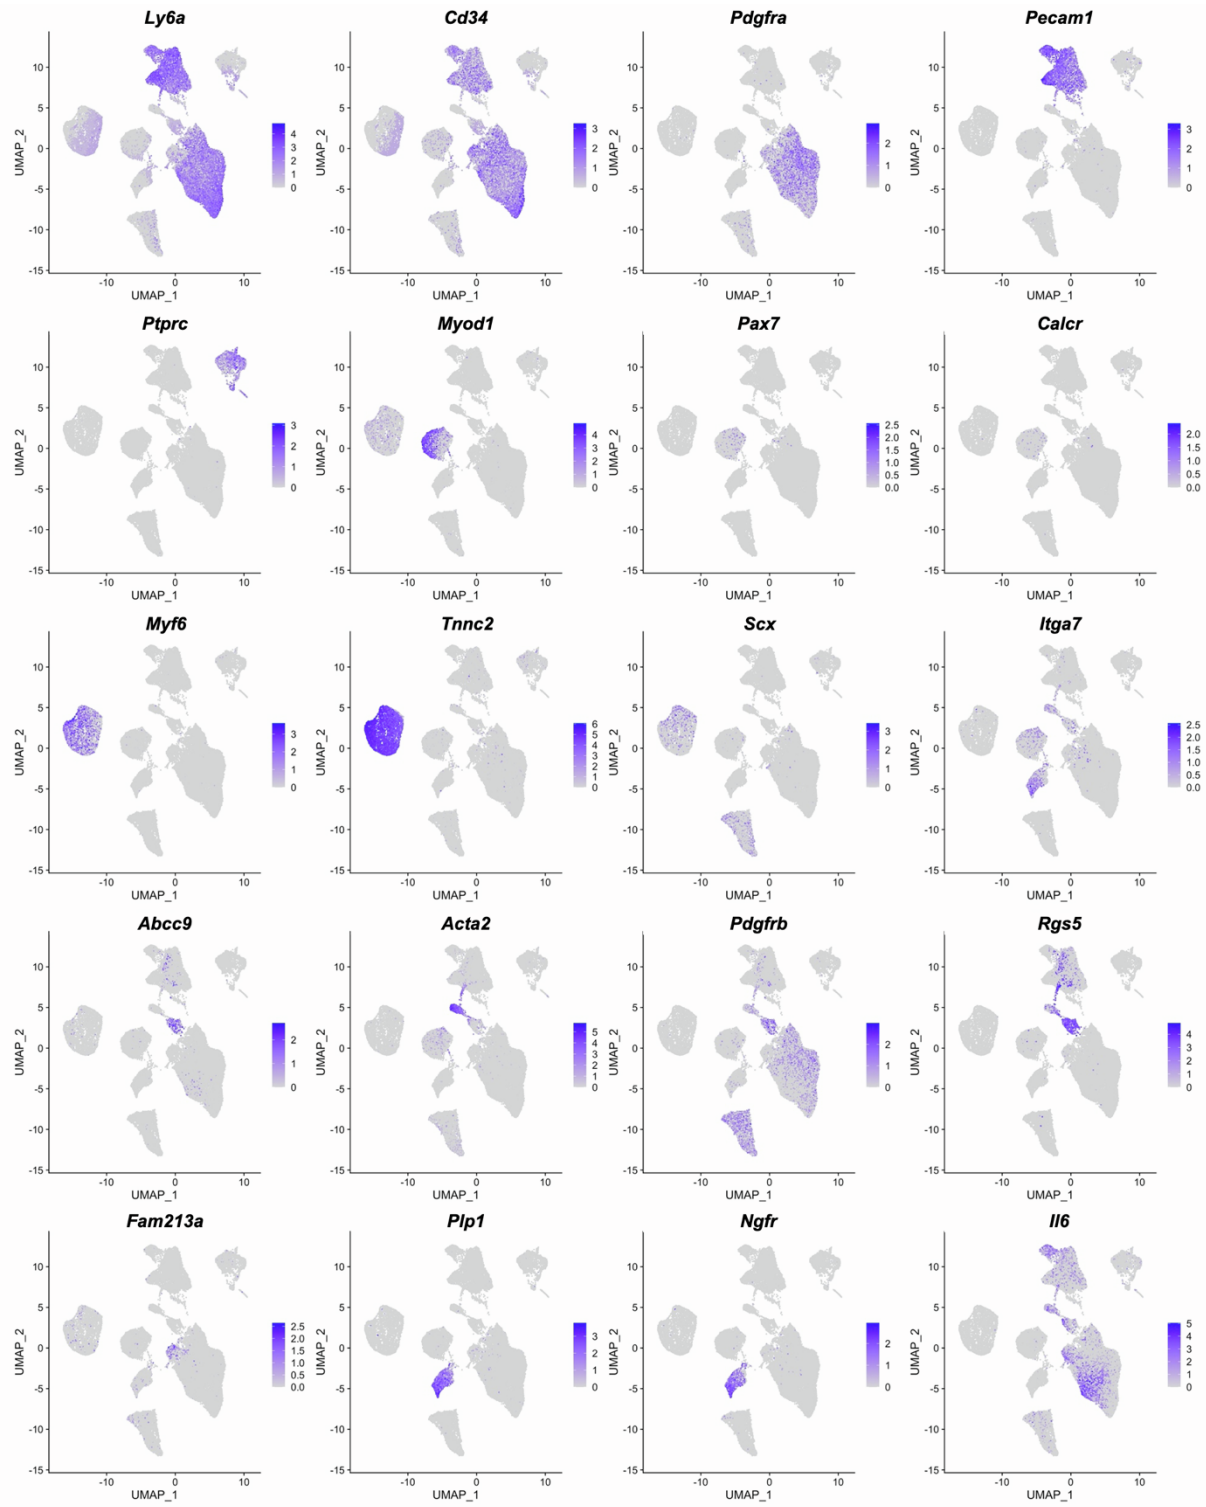

Figure S2. UMAP embedding of cell type-specific genes, Related to Figure 1  
 UMAP embedding of cell type-specific representative genes in all the single cells.

# Supplementary Figure 3

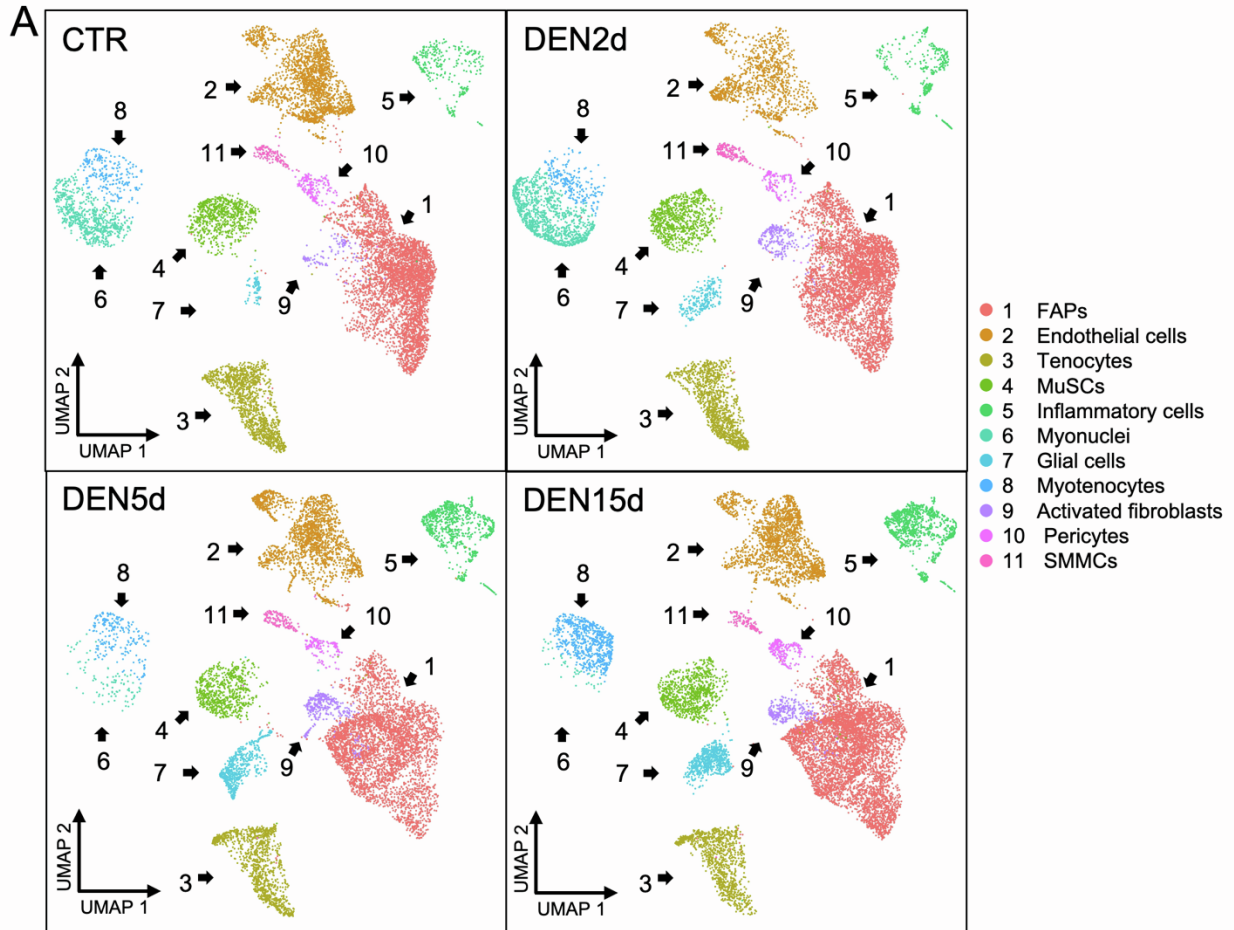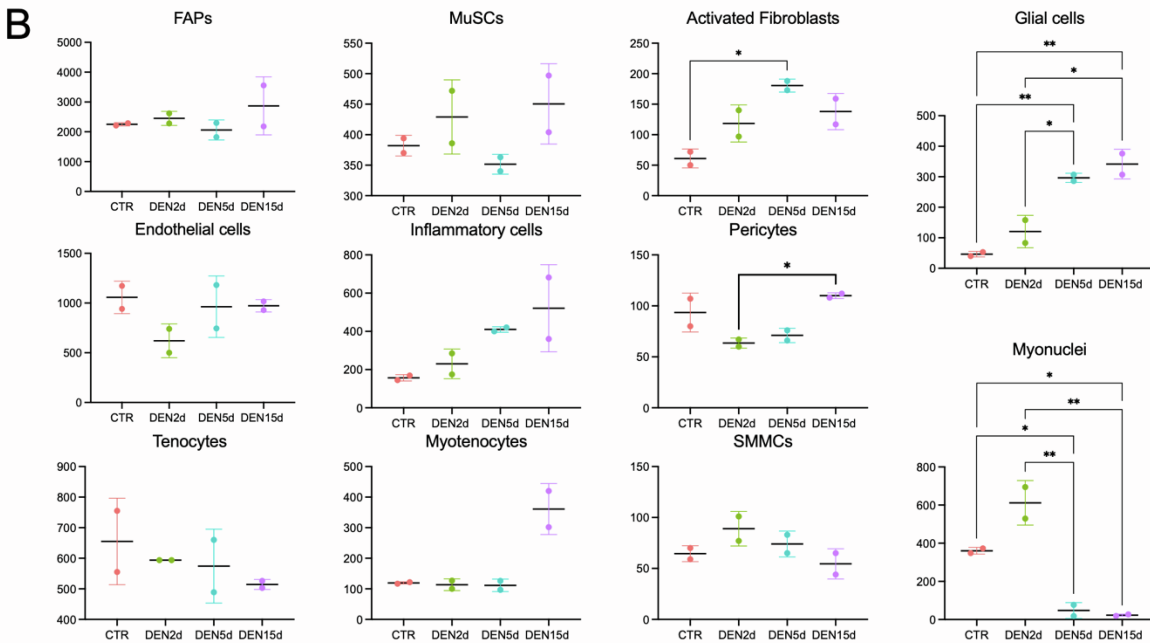

**Figure S3. Dynamic changes of muscle-resident cells following denervation, Related to Figure 2**

(A) UMAP embedding of single cells at CTR, DEN2d, DEN5d, and DEN15d, respectively.  
(B) Line plots showing the number of each cell population per condition per replicate. Statistical significance was analyzed by one-way ANOVA with P values shown as \* $p < 0.05$ . Not significant P values are not labeled.

# Supplementary Figure 4

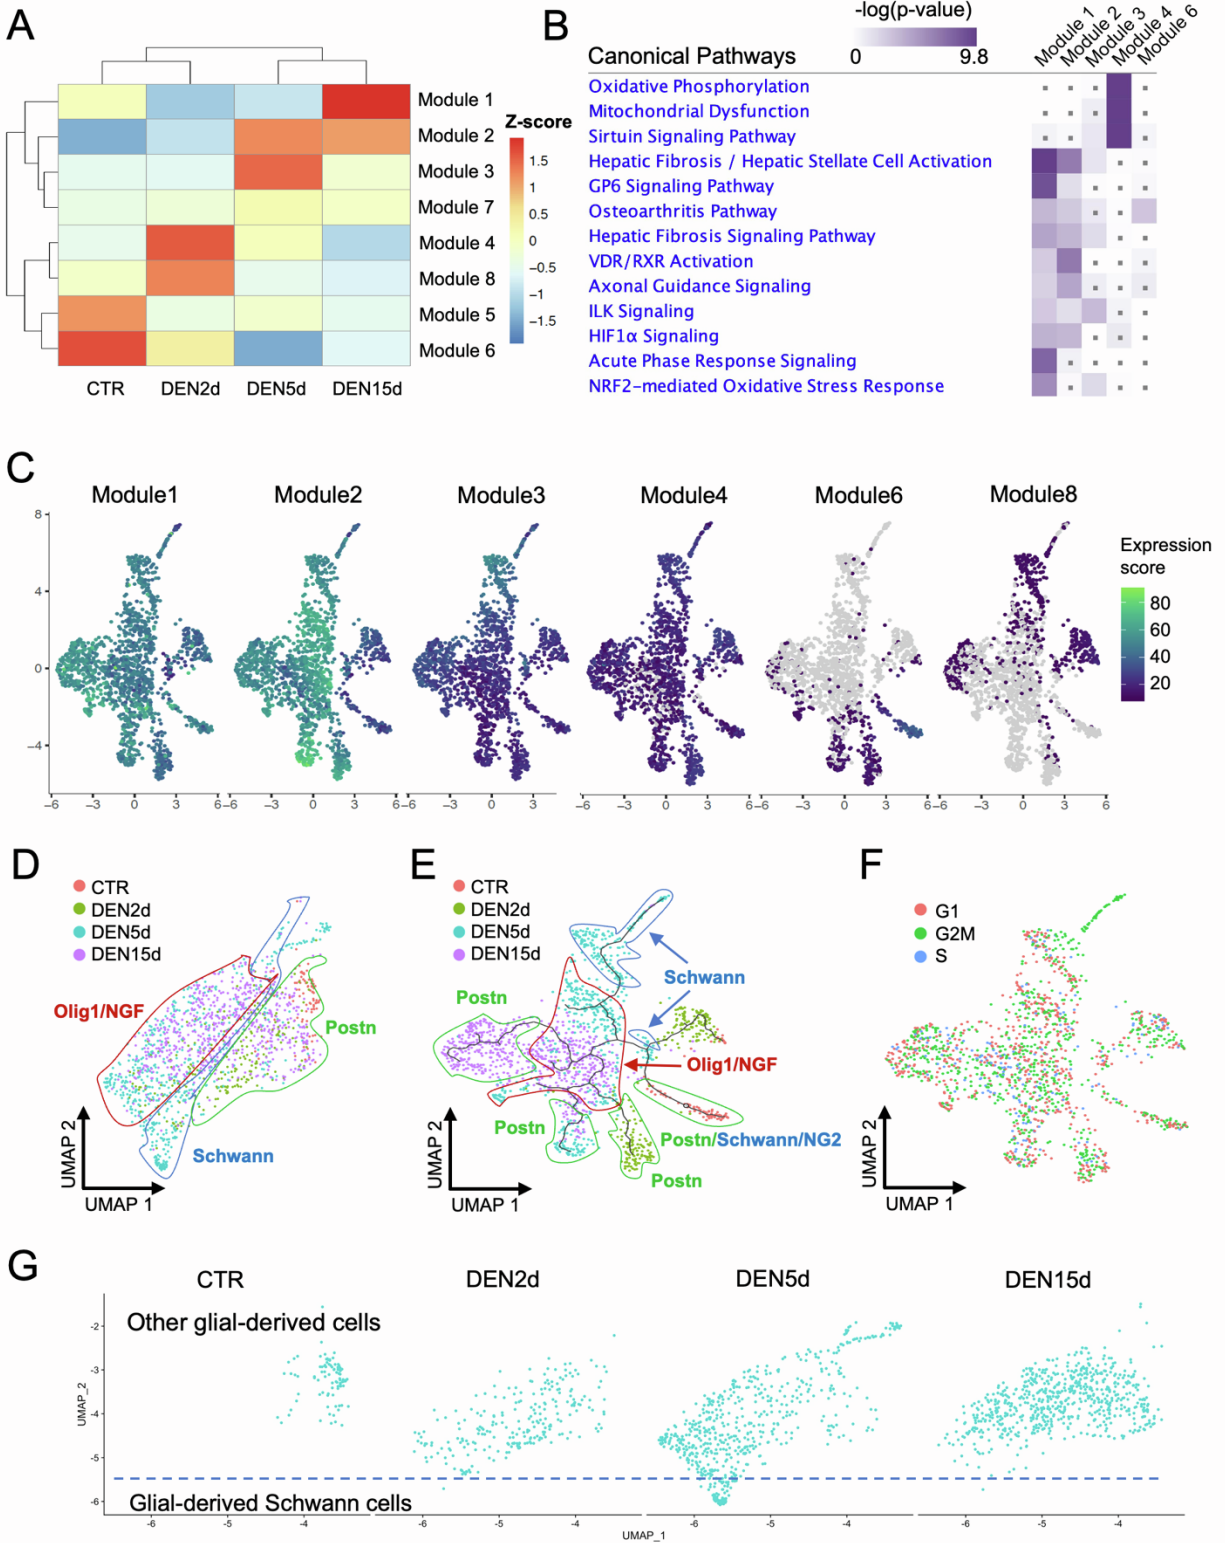

**Figure S4. Pseudo-time analysis of glial cells during denervation, Related to Figure 3**

(A) Monocle3 module analysis of co-expression of genes found differentially expressed along the pseudo-time trajectory.

(B) IPA analysis of genes belonging to modules enriched at each time point.

(C) UMAP embedding of the enrichment of genes (enrichment score) belonging to the major modules.

(D, E) Same as Figure 3D and 3E, with circles indicating different glial-derived lineages. Red circle: cells expressing *Olig1* and *Ngf*; Green circle: cells expressing *Postn*; Blue circle: cells expressing Schwann cells genes.

(F) UMAP embedding of glial cells after re-clustering, colored by cell cycle phase.

(G) UMAP embedding of glial cells before re-clustering at each time point. Dash line delineates the lower tip of Glial-derived Schwann cells that is specific of day 5 p.d.



# Supplementary Figure 5

## A

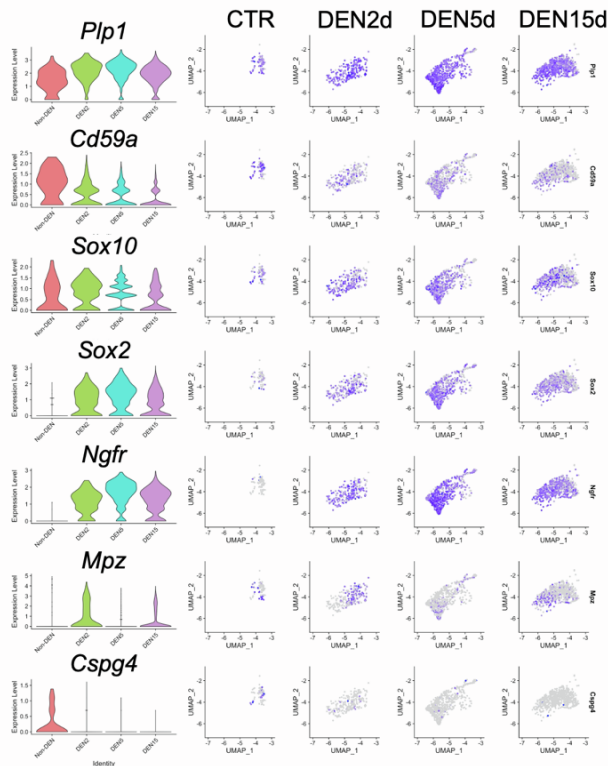

## B

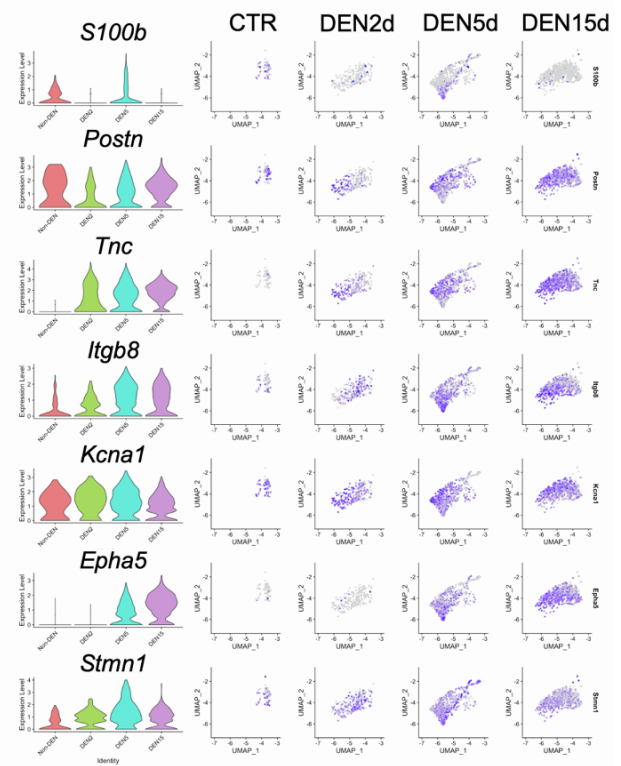

## C

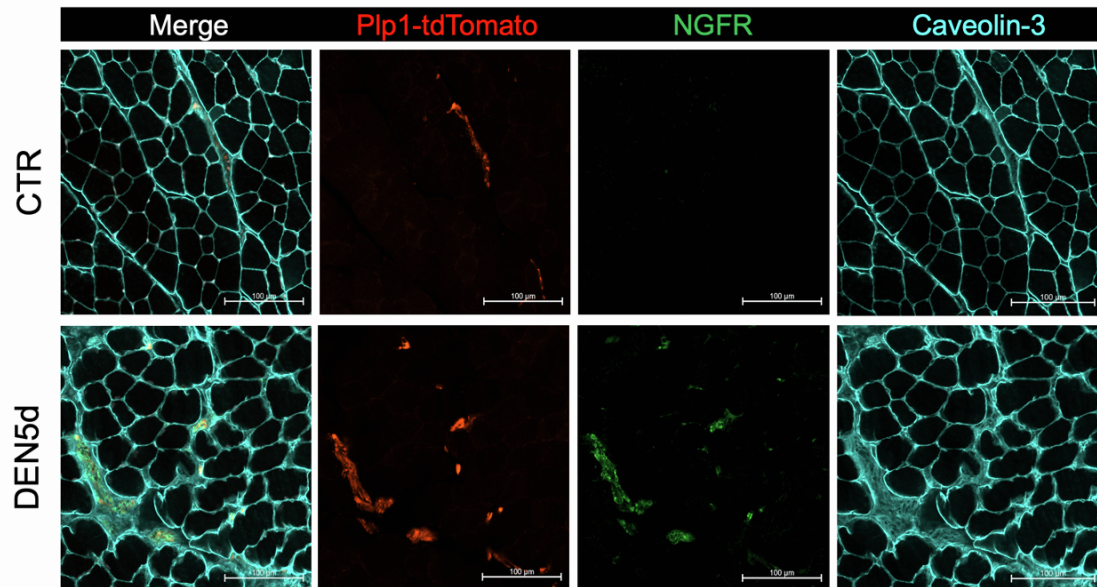

**Figure S5. Identification of denervation-activated glial cells, Related to Figure 3**

(A-B) Violin (left) and UMAP (right) plots showing dynamic expression of genes of interest in glial cells at each time point.

(C) Representative images of Caveolin-3 (cyan) and NGFR (green) immunofluorescence staining of trans-sectioned TA isolated from Control (CTR, upper) and denervated (DEN5d, lower) *Plp1-TdTomato* (red) mice. NGFR: Nerve Growth Factor Receptor; Plp1: myelin proteolipid protein 1. Scale bar: 100 $\mu$ m. N=4 mice.

## Supplementary Figure 6

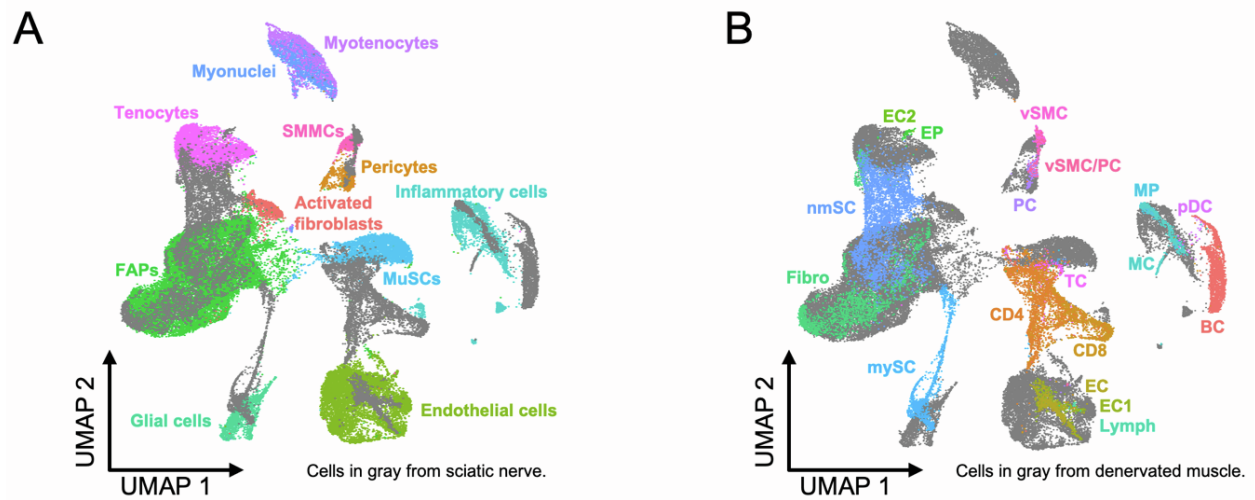

Figure S6. Comparative analysis of denervated muscle and sciatic nerve, Related to Figure 4

(A-B) UMAP embedding of the integration analysis of denervated muscle and sciatic nerve (Wolbert et al., 2020, PNAS) [1], with Wolbert et al. meta-cluster identities (B) or with the meta-cluster identities from our dataset (A).

## Supplementary Figure 7

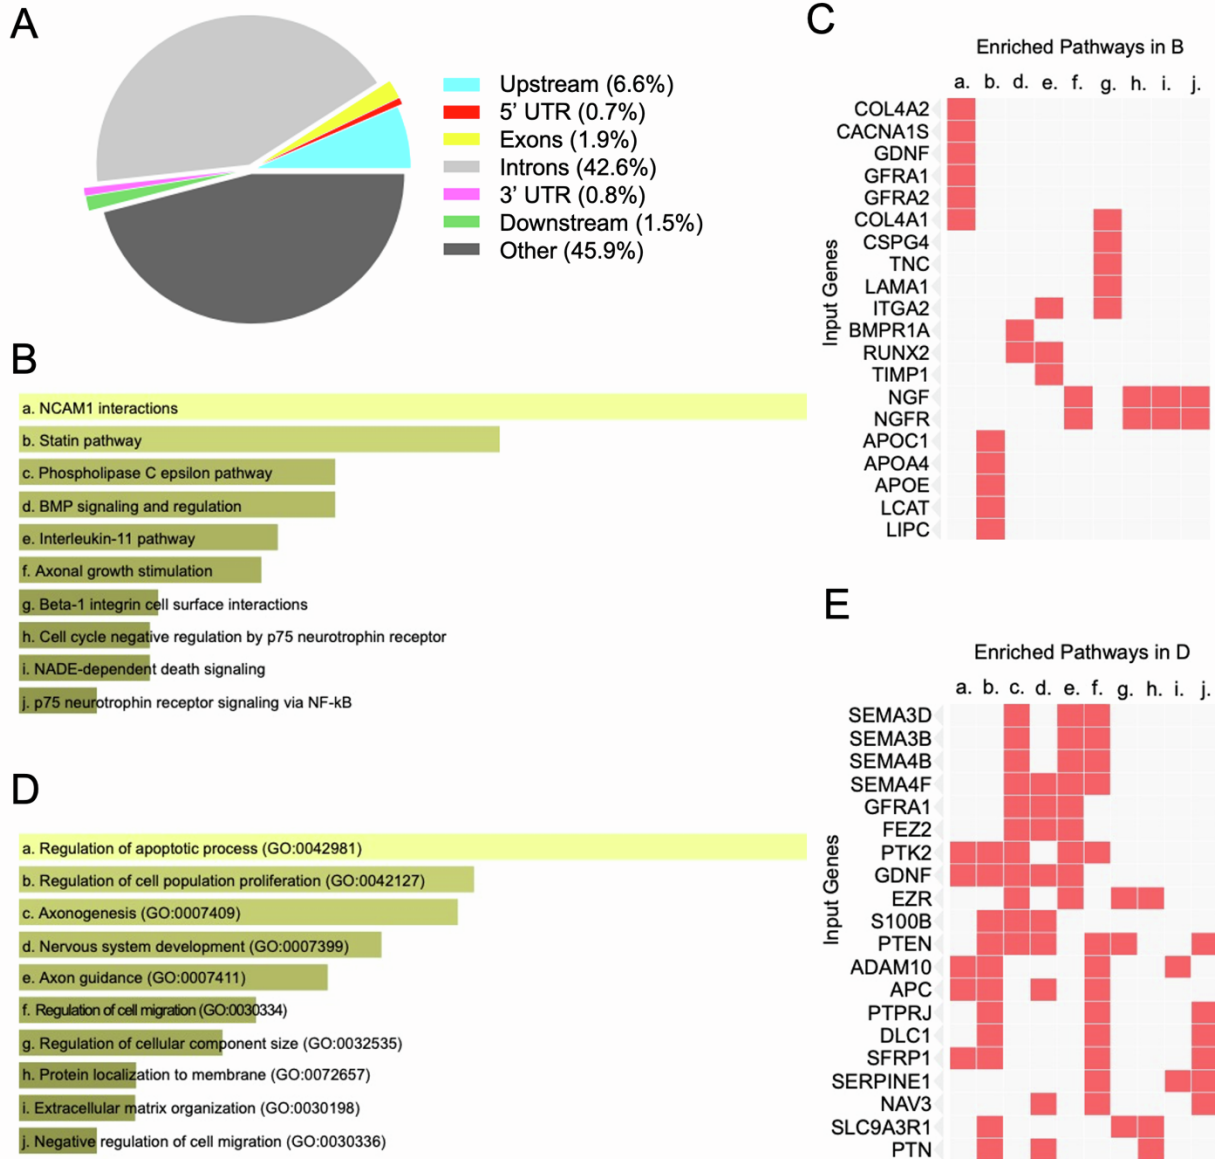

**Figure S7. Genomic distribution and gene ontology of differentially accessible regions in muscle-resident cells upon denervation, Related to Figure 5**

(A) Pie chart of the distribution of glial cells DARs in relation to genes (Pavis).

(B-E) EnrichR Pathway analysis for glial cells DARs falling either inside promoter regions (B-C; promoters defined as -1000/+200 bp from genes TSS) or non-promoter (D-E, genes used were the glial cells DEGs promoters closest to the non-promoter DARs), with statistically significant pathways ordered by p-value (barplots in B and D). (C) and (E) show a subset of genes related to the DARs and the enriched pathways in (D) and (E), respectively.

# Supplementary Figure 8

**A**

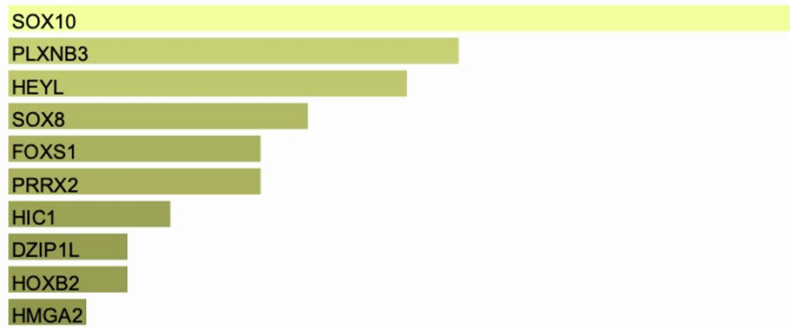

**B**

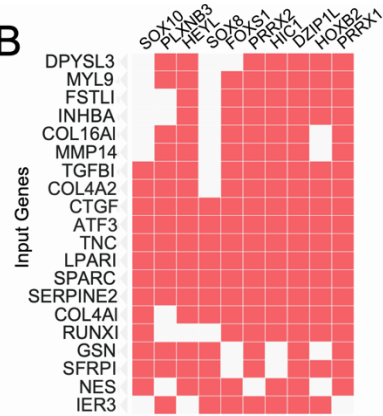

**C**

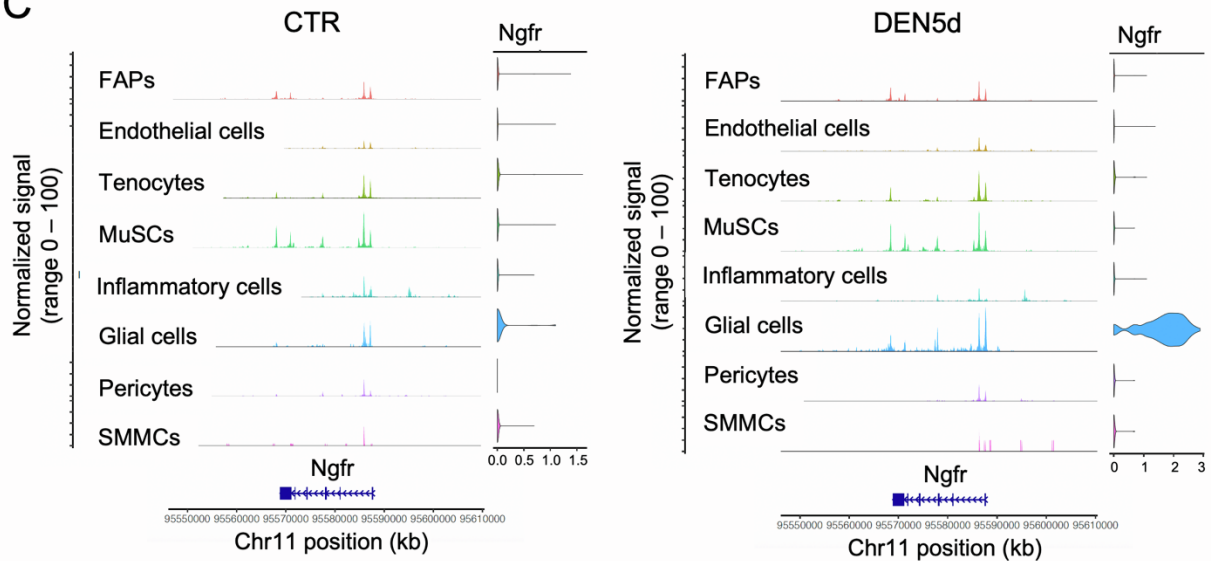

**D**

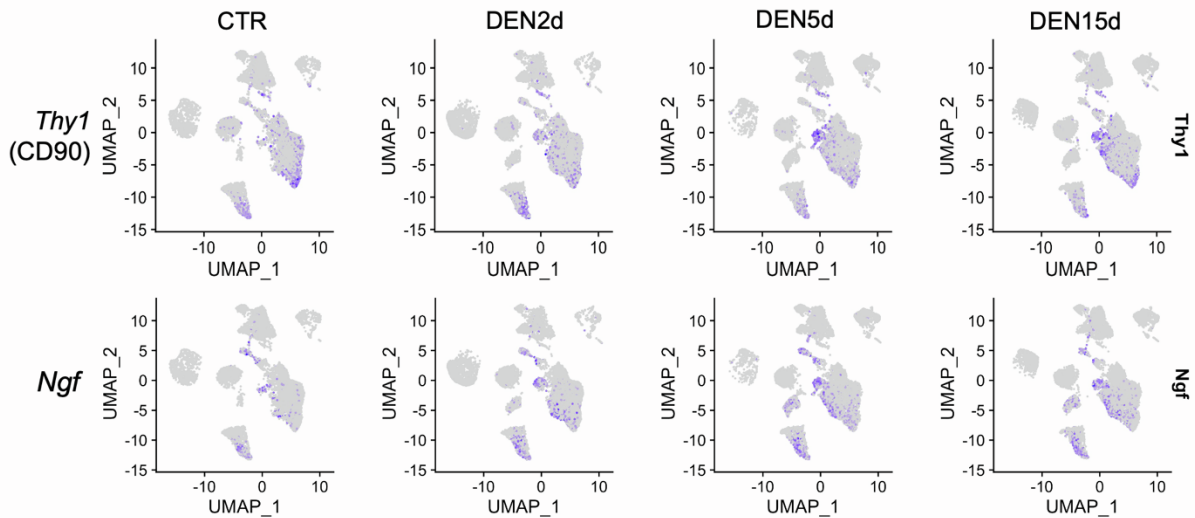

**Figure S8. Dynamic chromatin accessibility in muscle-resident glial cells upon denervation, Related to Figure 5**

(A-B) EnrichR Submissions TF-Gene Co-occurrence analysis for glial cells DARs falling inside promoter regions (promoters defined as -1000/+200 bp from genes TSS), with statistically significant Transcription Factors ordered by p-value (barplot in A). (B) shows a subset of genes related to the DARs and the enriched Transcription Factors in (A).

(C) Genomic tracks of the cumulative ATAC signal per cell population at the *Ngfr* locus, in control (CTR, left panel) and DEN5d (right panel) conditions. The violin plots of *Ngfr* expression from scRNA-seq data per cell population at CTR and DEN5d are shown on the right of the ATAC signals, respectively.

(D) UMAP embedding of *Thy1* (CD90, upper) and *Ngf* (bottom) in all single cells at each time point.

# Supplementary Figure 9

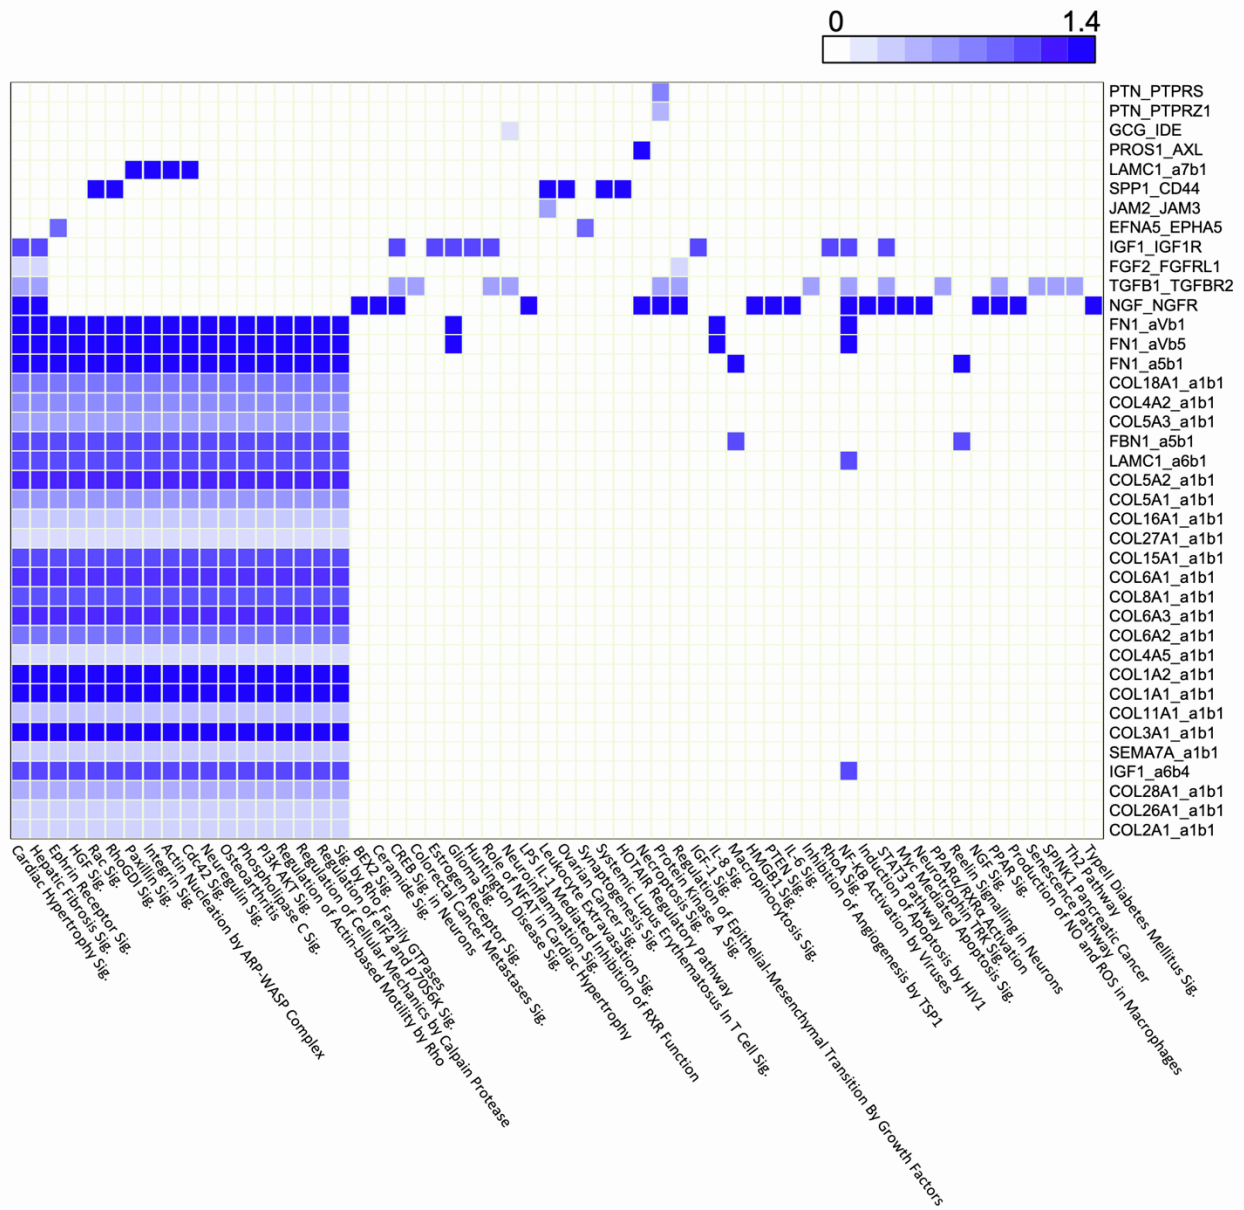

Figure S9. Integration of interactome analysis and gene ontology, Related to Figure 6 Heatmap containing the molecular pathways connected to a specific receptor-ligand pair for the interactions between glial cells and activated fibroblasts, with their interaction score in blue.

# Supplementary Figure 10

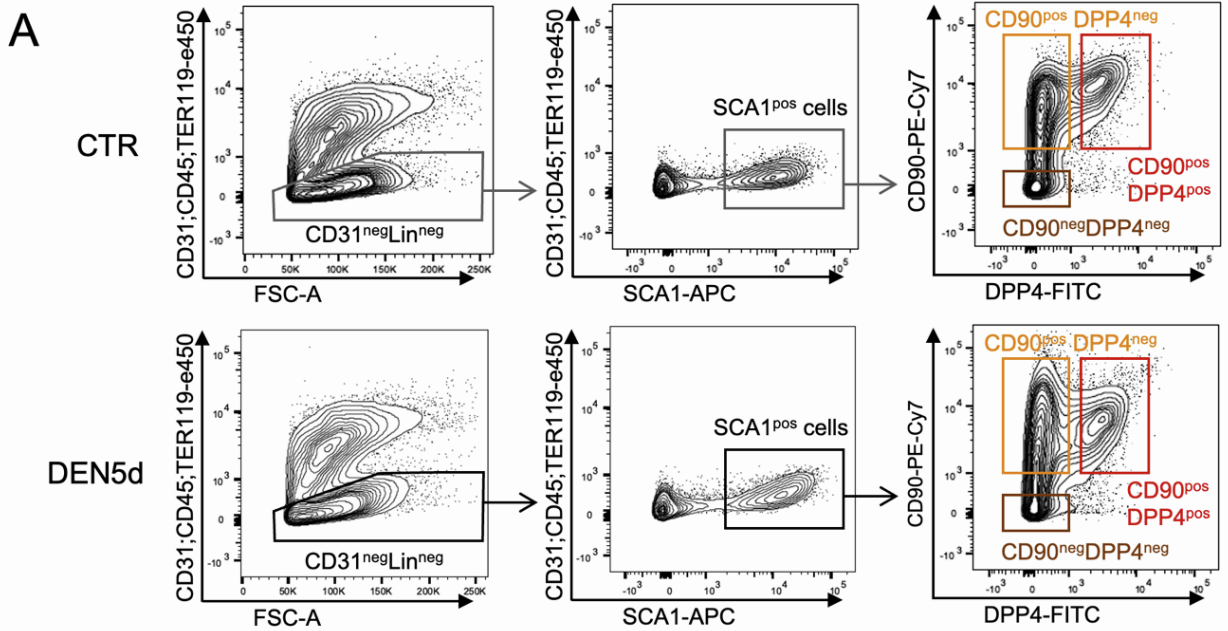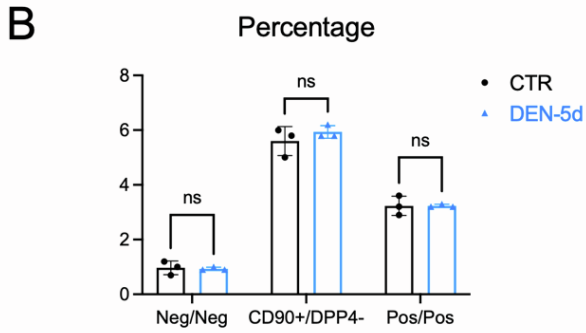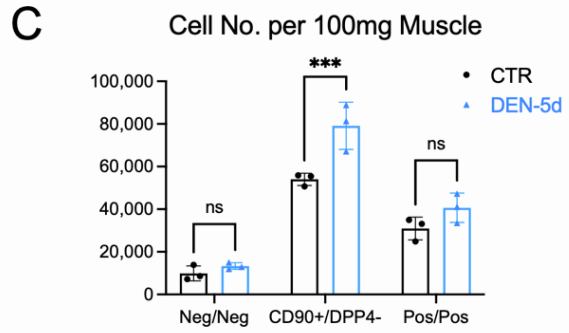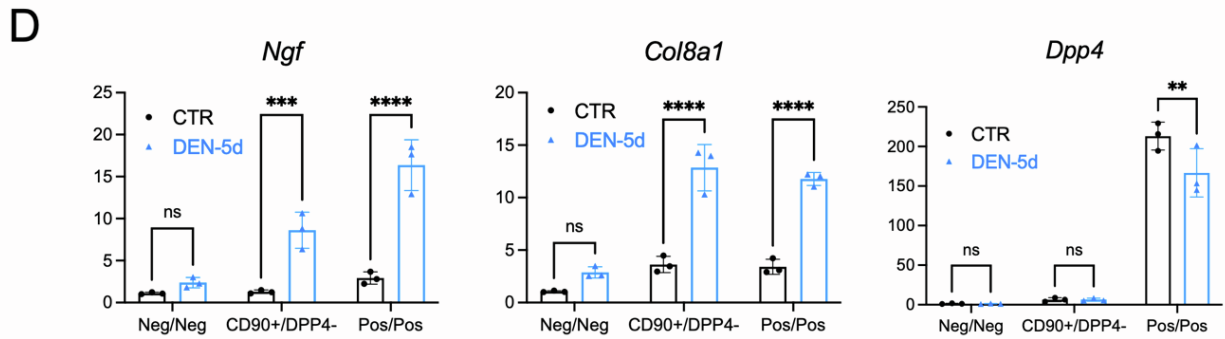



**Figure S10. Sorting strategy for isolation of Activated Fibroblasts, Related to Figure 6**

(A) FACS plot showing the sorting strategy for CD90<sup>pos</sup>DPP4<sup>neg</sup> Activated Fibroblasts from muscles of Control (upper, CTR) and DEN5d (bottom) B6 mice.

(B) Percentages of CD90<sup>neg</sup>DPP4<sup>neg</sup>, CD90<sup>pos</sup>DPP4<sup>neg</sup>, CD90<sup>pos</sup>DPP4<sup>pos</sup> cells in CTR and DEN-5d muscles.

(C) Numbers of CD90<sup>neg</sup>DPP4<sup>neg</sup>, CD90<sup>pos</sup>DPP4<sup>neg</sup>, CD90<sup>pos</sup>DPP4<sup>pos</sup> cells in CTR and DEN-5d muscles (normalized to muscle weight).

(D) RT-qPCR results of selected genes in CD90<sup>neg</sup>DPP4<sup>neg</sup>, CD90<sup>pos</sup>DPP4<sup>neg</sup>, CD90<sup>pos</sup>DPP4<sup>pos</sup> cells in CTR and DEN-5d muscles (normalized to *Gapdh*).

In B-D, data are represented as mean  $\pm$  SD and N=3 mice.

## Supplementary Figure 11

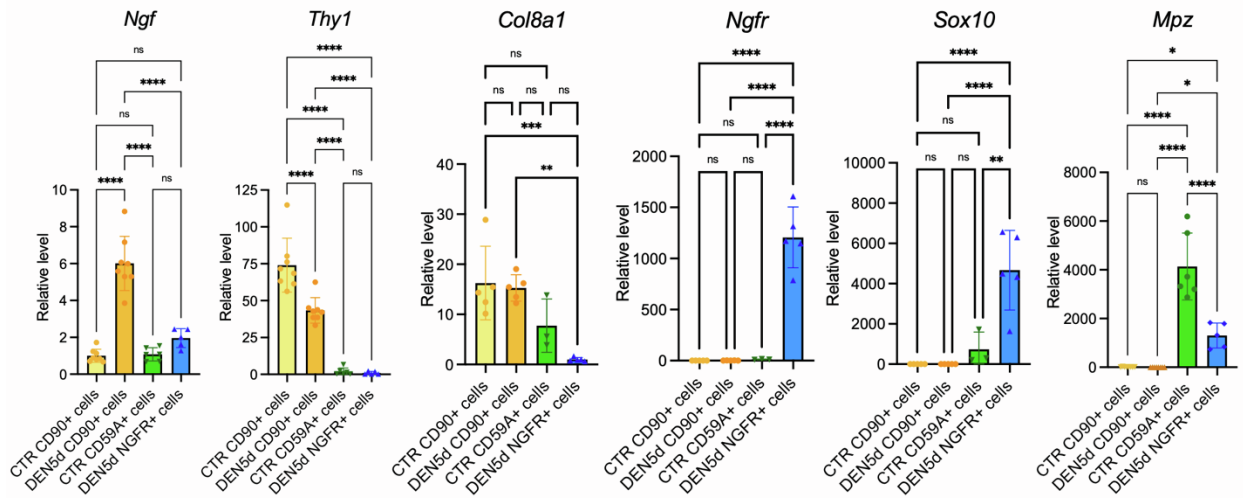

**Figure S11. Validation of cell identity marker genes, Related to Figure 7**

Real time PCR results of selected genes in CD90<sup>pos</sup> cells, CD59A<sup>pos</sup> cells, NGFR<sup>pos</sup> cells isolated from CTR and DEN5d muscles (normalized to *Actb*). Statistical significance was analyzed by one-way ANOVA with P values shown as \*p < 0.05, \*\*p < 0.01, \*\*\*p < 0.001, \*\*\*\*p < 0.0001 and ns for not significant.

# Supplementary Figure 12

**A**

## NGF treatment experiment

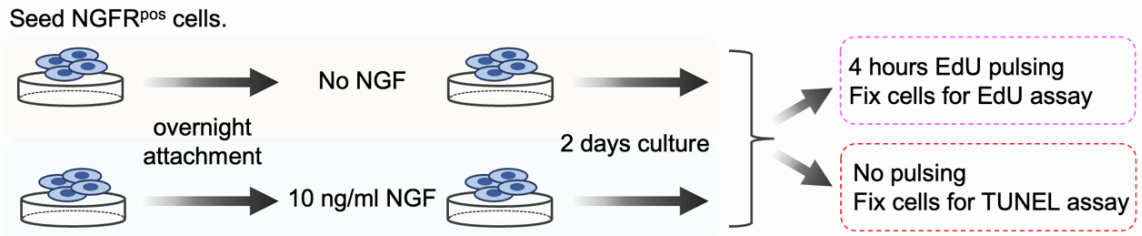

**B**

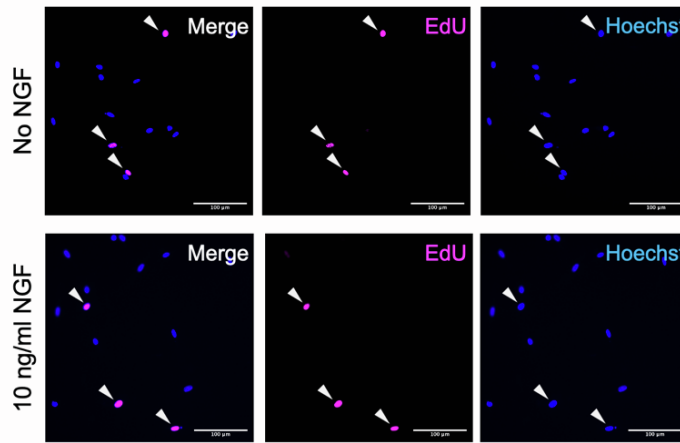

**C**

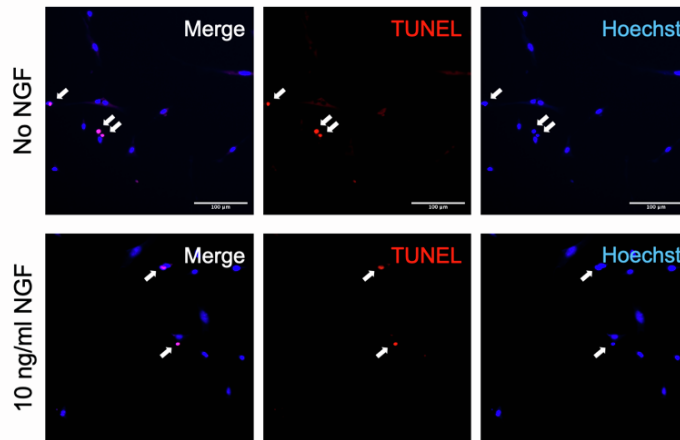

**D**

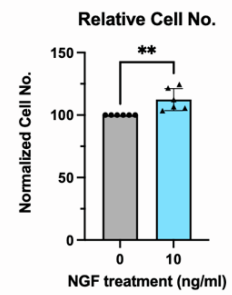

**E**

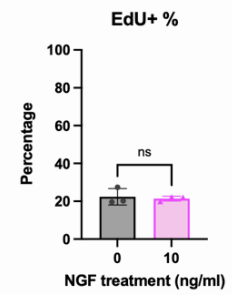

**F**

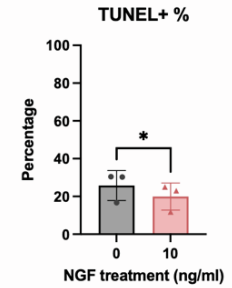

**Figure S12. NGF-treatment experiment, Related to Figure 7**

(A) Graphic illustration of NGFR<sup>pos</sup> cells with 0 or 10 ng/ml NGF treatment at Day1 to Day3 in culture. Cells were fixed for EdU assay (EdU was added for 4 hours pulsing before fixation) and TUNEL assay, respectively.

(B) Representative images of EdU staining (magenta), counterstained with Hoechst (blue). Arrow heads indicate EdU<sup>pos</sup> Glial cells. Scale bar: 100 $\mu$ m.

(C) Representative images of TUNEL staining (red), counterstained with Hoechst (blue). Arrow heads indicate TUNEL<sup>pos</sup> Glial cells.

(D) Glial cell number per field was quantified in two groups. By normalization to the CTR group, relative Glial cell number was shown. N=6 mice.

(E) EdU<sup>pos</sup> percentage of Glial cells with 0 or 10 ng/ml NGF treatment. N=3 mice.

(F) TUNEL<sup>pos</sup> percentage of Glial cells with 0 or 10 ng/ml NGF treatment. N=3 mice.

Statistical significance was analyzed by paired Student's t-test in (D-F) with P values shown as \*p < 0.05, \*\*p < 0.01, and ns for not significant.

**Supplementary Table 1 Related to Figure 2A. Cell counts and percentages for each cell population per condition per replicate**

| <b>Cell type</b>      | <b>CTR_R1</b> | <b>CTR_R2</b> | <b>DEN2d_R1</b> | <b>DEN2d_R2</b> | <b>DEN5d_R1</b> | <b>DEN5d_R2</b> | <b>DEN15d_R1</b> | <b>DEN15d_R2</b> |
|-----------------------|---------------|---------------|-----------------|-----------------|-----------------|-----------------|------------------|------------------|
| FAPs                  | 2290 [45.3%]  | 2212 [40.7%]  | 2283 [42.6%]    | 2617 [47.4%]    | 2299 [40.8%]    | 1825 [39.3%]    | 3557 [48.4%]     | 2182 [40.7%]     |
| Endothelial cells     | 942 [18.6%]   | 1173 [21.6%]  | 741 [13.8%]     | 500 [9.1%]      | 1182 [21%]      | 745 [16%]       | 929 [12.6%]      | 1017 [19%]       |
| Tenocytes             | 555 [11%]     | 755 [13.9%]   | 594 [11.1%]     | 594 [10.8%]     | 660 [11.7%]     | 489 [10.5%]     | 526 [7.2%]       | 503 [9.4%]       |
| MuSCs                 | 370 [7.3%]    | 394 [7.2%]    | 472 [8.8%]      | 386 [7%]        | 363 [6.4%]      | 340 [7.3%]      | 497 [6.8%]       | 404 [7.5%]       |
| Inflammatory cells    | 169 [3.3%]    | 145 [2.7%]    | 175 [3.3%]      | 285 [5.2%]      | 400 [7.1%]      | 420 [9%]        | 682 [9.3%]       | 360 [6.7%]       |
| Myonuclei             | 373 [7.4%]    | 348 [6.4%]    | 529 [9.9%]      | 694 [12.6%]     | 18 [0.3%]       | 77 [1.7%]       | 27 [0.4%]        | 19 [0.4%]        |
| Glial cells           | 40 [0.8%]     | 53 [1%]       | 158 [2.9%]      | 83 [1.5%]       | 286 [5.1%]      | 307 [6.6%]      | 376 [5.1%]       | 307 [5.7%]       |
| Myotenocytes          | 117 [2.3%]    | 122 [2.2%]    | 100 [1.9%]      | 127 [2.3%]      | 97 [1.7%]       | 126 [2.7%]      | 420 [5.7%]       | 302 [5.6%]       |
| Activated Fibroblasts | 50 [1%]       | 72 [1.3%]     | 140 [2.6%]      | 97 [1.8%]       | 173 [3.1%]      | 188 [4%]        | 159 [2.2%]       | 117 [2.2%]       |
| Pericytes             | 80 [1.6%]     | 107 [2%]      | 67 [1.3%]       | 60 [1.1%]       | 76 [1.3%]       | 66 [1.4%]       | 112 [1.5%]       | 108 [2%]         |
| SMMCs                 | 70 [1.4%]     | 59 [1.1%]     | 101 [1.9%]      | 77 [1.4%]       | 83 [1.5%]       | 65 [1.4%]       | 65 [0.9%]        | 44 [0.8%]        |
| <b>Total</b>          | <b>5056</b>   | <b>5440</b>   | <b>5360</b>     | <b>5520</b>     | <b>5637</b>     | <b>4648</b>     | <b>7350</b>      | <b>5363</b>      |

**Supplementary Table 2 Related to Figure 2B. Number of DE genes [UP number/ DOWN number] for each cell population at DEN2d, DEN5d, and DEN15d, respectively, in comparison with CTR.**

| <b>Cell type</b>      | <b>DEN2d [UP/DOWN]</b> | <b>DEN5d [UP/DOWN]</b> | <b>DEN15d [UP/DOWN]</b> |
|-----------------------|------------------------|------------------------|-------------------------|
| FAPs                  | 110 [59/51]            | 195 [115/80]           | 101 [70/31]             |
| Endothelial cells     | 103 [63/40]            | 107 [64/43]            | 29 [14/15]              |
| Tenocytes             | 100 [59/41]            | 115 [73/42]            | 46 [18/28]              |
| MuSCs                 | 59 [27/32]             | 111 [55/56]            | 109 [51/58]             |
| Inflammatory cells    | 431 [172/259]          | 178 [117/61]           | 52 [33/19]              |
| Myonuclei             | 108 [108/0]            | 328 [328/0]            | 154 [154/0]             |
| Glial cells           | 1289 [923/366]         | 1114 [779/335]         | 703 [386/317]           |
| Myotenocytes          | 94 [94/0]              | 257 [257/0]            | 114 [114/0]             |
| Activated fibroblasts | 862 [576/286]          | 564 [403/161]          | 442 [327/115]           |
| Pericytes             | 25 [25/0]              | 49 [49/0]              | 29 [29/0]               |
| SMMCs                 | 82 [82/0]              | 51 [51/0]              | 36 [36/0]               |

**Supplementary Table 3 Related to Figure 2C. Top 20 marker genes for each cell population**

| <b>FAPs</b> | <b>Endothelial cells</b> | <b>Tenocytes</b> | <b>MuSCs</b> | <b>Inflamm. cells</b> | <b>Myonuclei</b> | <b>Glial cells</b> | <b>Myotenocytes</b> | <b>Activated Fibroblasts</b> | <b>Pericytes</b> | <b>SMMCs</b> |
|-------------|--------------------------|------------------|--------------|-----------------------|------------------|--------------------|---------------------|------------------------------|------------------|--------------|
| Gsn         | Fabp4                    | Fmod             | Myod1        | Cd74                  | Ckm              | Plp1               | Mb                  | Spp1                         | Rgs5             | Acta2        |
| Cxcl14      | Cldn5                    | Thbs4            | Asb5         | H2-Aa                 | Tnnc2            | Lgals3             | Car3                | Apod                         | Gm13889          | Tagln        |
| Smoc2       | Aqp1                     | Comp             | Gal          | Lyz2                  | Tpm1             | Cryab              | Tpm2                | Cxcl5                        | Ednrb            | Gm13889      |
| Col3a1      | Ctla2a                   | Chad             | Fam132b      | H2-Eb1                | Tnnt3            | Cpe                | Acta1               | Ccl2                         | Kcnj8            | MyI9         |
| Tnfaip6     | Tm4sf1                   | Angptl7          | Sdc4         | H2-Ab1                | Tnni2            | Btc                | MyIpf               | Inhba                        | Rgs4             | Myh11        |
| Ptx3        | Isg15                    | Tnmd             | Pmepa1       | Cd14                  | MyIpf            | Vim                | MyI1                | Il33                         | Vtn              | Pmvk         |
| Ugdh        | Ilgp1                    | Col1a1           | Gpx3         | C1qb                  | MyI1             | Dbi                | Tcap                | Gpc3                         | Abcc9            | Tsc22d1      |
| Ifi205      | Cxcl10                   | Serpinf1         | Msc          | Fcer1g                | Acta1            | Tnc                | Tnni2               | Tgfbi                        | Hopx             | MyI1k        |
| Pi16        | Ifit1                    | Cilp2            | Arl4d        | Cxcl2                 | Aldoa            | Tmem158            | Tnnt3               | Rdh10                        | Art3             | Mustn1       |
| Mfap5       | Flt1                     | Ctgf             | Flncl        | Tyrobp                | Eno3             | Ngfr               | Tnnc2               | Dio3                         | Steap4           | Tpm2         |
| Fgl2        | Cdh5                     | Lox              | Crlf1        | Pf4                   | Actn3            | Kcna1              | Csrp3               | Cthrc1                       | Rasd1            | MyI6         |
| Lum         | Pecam1                   | Col1a2           | Runx1        | Cd52                  | Myh4             | Col18a1            | Slc25a4             | Lif                          | Malat1           | Pcp4l1       |
| Cxcl1       | Id1                      | Kera             | Des          | Ctss                  | Atp2a1           | Atf3               | Cox6a2              | Scd1                         | Ebf1             | Crip1        |
| Gfpt2       | Gbp2                     | 1500015O10Rik    | Cd82         | C1qa                  | Pvalb            | Ptn                | Fhl1                | Il11                         | Ndufa4l2         | Rasd1        |
| Myoc        | Cd36                     | Timp1            | Myf5         | Il1b                  | Myoz1            | Ucn2               | Tpm1                | Cp                           | Cystm1           | Dstn         |
| C3          | H2-K1                    | Cpxm2            | S100a16      | Wfdc17                | Gapdh            | Ywhah              | Atp5g1              | Ccl11                        | Gadd45b          | Flna         |
| Has1        | Plaur                    | Abi3bp           | Pold4        | Lgals3                | Tcap             | Gatm               | Ckm                 | Timp1                        | Hspa1a           | Csrp1        |
| Ptgs2       | Rsad2                    | Mfap4            | Odc1         | Ccl9                  | Ppp1r27          | Mpz                | Des                 | Cxcl2                        | Procr            | Emd          |
| Serping1    | Akap12                   | Itgbl1           | Cd63         | Srgn                  | Slc25a4          | Tubb2b             | Aldoa               | Lum                          | Hspa1b           | Crem         |
| Ccl11       | Egfl7                    | Col12a1          | Fosl1        | Apoe                  | Pgam2            | Oaf                | Hspb6               | Trf                          | Ccl11            | Crispld2     |





**Supplementary Table 5 Related to STAR Methods Key Resource Table (Oligonucleotides section): List of real time PCR primers used in this paper.**

| <b>Oligonucleotide name</b> | <b>Sequence (5' to 3')</b> |
|-----------------------------|----------------------------|
| Mus_Dpp4_qPCR_F1            | ACCGTGGAAAGGTTCTTCTGG      |
| Mus_Dpp4_qPCR_R1            | CACAAAGAGTAGGACTTGACCC     |
| Mus_Ngf_qPCR_F1             | CCAGTGAAATTAGGCTCCCTG      |
| Mus_Ngf_qPCR_R1             | CCTTGGCAAAACCTTTATTGGG     |
| Mus_Col8a1_qPCR_F1          | ACTCTGTCAGACTCATTGAGGC     |
| Mus_Col8a1_qPCR_R1          | CAAAGGCATGTGAGGGACTTG      |
| Mus_GAPDH_qPCR_F1           | CACCATCTTCCAGGAGCGAG       |
| Mus_GAPDH_qPCR_R1           | CCTTCTCCATGGTGGTGAAGAC     |
| Mus_Actb_qPCR_F1            | CACTGTGCGAGTCGCGTCC        |
| Mus_Actb_qPCR_R1            | TCATCCATGGCGAACTGGTG       |
| Mus_Thy1_qPCR_F1            | TGCTCTCAGTCTTGCAGGTG       |
| Mus_Thy1_qPCR_R1            | TGGATGGAGTTATCCTTGGTGTT    |
| Mus_Ngfr_qPCR_F1            | TGCCTGGACAGTGTTACGTT       |
| Mus_Ngfr_qPCR_R1            | ACAGGGAGCGGACATACTCT       |
| Mus_Sox10_qPCR_F1           | ACACCTTGGGACACGGTTTTTC     |
| Mus_Sox10_qPCR_R1           | TAGGTCTTGTTCCCTCGGCCAT     |
| Mus_Mpz_qPCR_F1             | TCTCAGGTCACGCTCTATGTC      |
| Mus_Mpz_qPCR_R1             | GCCAGCAGTACCGAATCAG        |

## Supplemental reference

[S1] Wolbert, J., Li, X., Heming, M., Mausberg, A.K., Akkermann, D., Frydrychowicz, C., Fledrich, R., Groeneweg, L., Schulz, C., Stettner, M., et al. (2020). Redefining the heterogeneity of peripheral nerve cells in health and autoimmunity. *Proc Natl Acad Sci U S A* 117, 9466–9476. [10.1073/pnas.1912139117](https://doi.org/10.1073/pnas.1912139117).
